# Supplementary material for: Development of a new and environment friendly hollow fiber-supported liquid phase microextraction using vesicular aggregate-based supramolecular solvent
Source: Royal Society of Chemistry journal article supplement (doi:10.1039/c2an35304k), 2012-01-01
Supplement: c2an35304k.pdf [file c2an35304k.pdf]

**Analysis of variance table (ANOVA) for response surface quadratic model.**

| Source          | Sum of square | d.f. <sup>a</sup> | Mean square | <i>F</i> -Ratio | <i>P</i> -Value | Effect <sup>b</sup> |
|-----------------|---------------|-------------------|-------------|-----------------|-----------------|---------------------|
| Model           | 128.1         | 14                | 9.1         | 13.06           | <0.0001         | S                   |
| A-HF length     | 9.7           | 1                 | 9.7         | 13.9            | 0.0029          | S                   |
| B-Time          | 56.8          | 1                 | 56.8        | 81.1            | <0.0001         | S                   |
| C-Stirring rate | 17.6          | 1                 | 17.6        | 25.2            | 0.0003          | S                   |
| D-NaCl%         | 4.5           | 1                 | 4.5         | 6.4             | 0.0242          | S                   |
| AB              | 3.4           | 1                 | 3.4         | 4.8             | 0.0486          | S                   |
| AC              | 0.04          | 1                 | 0.04        | 0.057           | 0.8152          | NS                  |
| AD              | 0.93          | 1                 | 0.93        | 1.3             | 0.2714          | NS                  |
| BC              | 6.6           | 1                 | 6.6         | 9.5             | 0.0096          | S                   |
| BD              | 0.037         | 1                 | 0.037       | 0.05            | 0.8215          | NS                  |
| CD              | 1.3           | 1                 | 1.3         | 1.85            | 0.1992          | NS                  |
| A <sup>2</sup>  | 24.6          | 1                 | 24.6        | 35.1            | <0.0001         | S                   |
| B <sup>2</sup>  | 0.68          | 1                 | 0.68        | 0.97            | 0.3433          | NS                  |
| C <sup>2</sup>  | 0.82          | 1                 | 0.82        | 1.17            | 0.2998          | NS                  |
| D <sup>2</sup>  | 0.091         | 1                 | 0.091       | 0.13            | 0.7246          | NS                  |
| Residual        | 8.4           | 12                | 0.7         |                 |                 |                     |
| Lack of Fit     | 8.2           | 10                | 0.82        | 7.6             | 0.121           | NS                  |
| Pure Error      | 0.21          | 2                 | 0.11        |                 |                 |                     |
| Total (corr.)   | 136.5         | 26                |             |                 |                 |                     |

<sup>a</sup>degree of freedom.

<sup>b</sup>S: significant, NS: not significant.
